# Supplementary material for: Low-Rank Representation of Head Impact Kinematics: A Data-Driven Emulator
Source: PubMed Central journal article supplement (PMC7546353; doi:10.3389/fbioe.2020.555493), 2020-09-25
Supplement: Data_Sheet_1.pdf [file Data_Sheet_1.pdf]

# Supplementary Materials

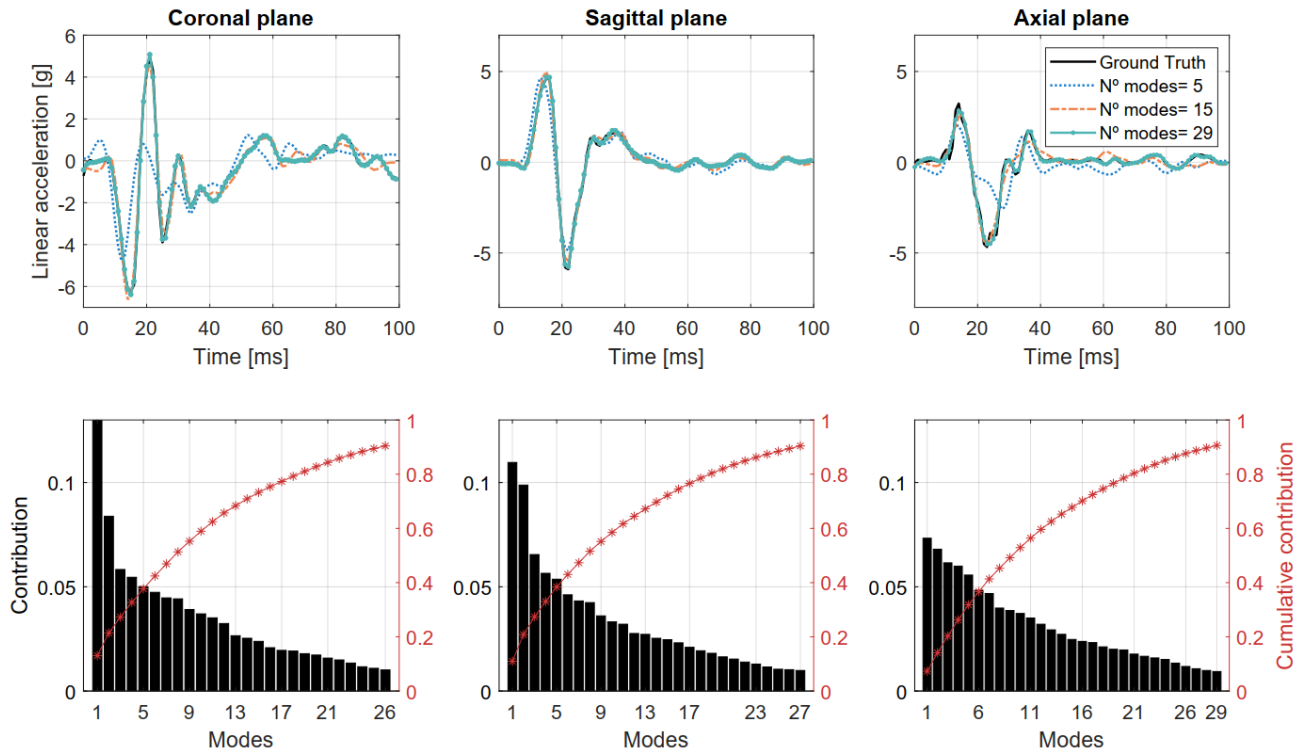

Figure SM.1: *Top:* Representative reconstruction of the linear acceleration data for a single head impact. *Bottom:* Individual and cumulative contribution of the temporal modes derived through PCA for angular velocity in each anatomical direction, constituting over 90% of the ground truth measurements.

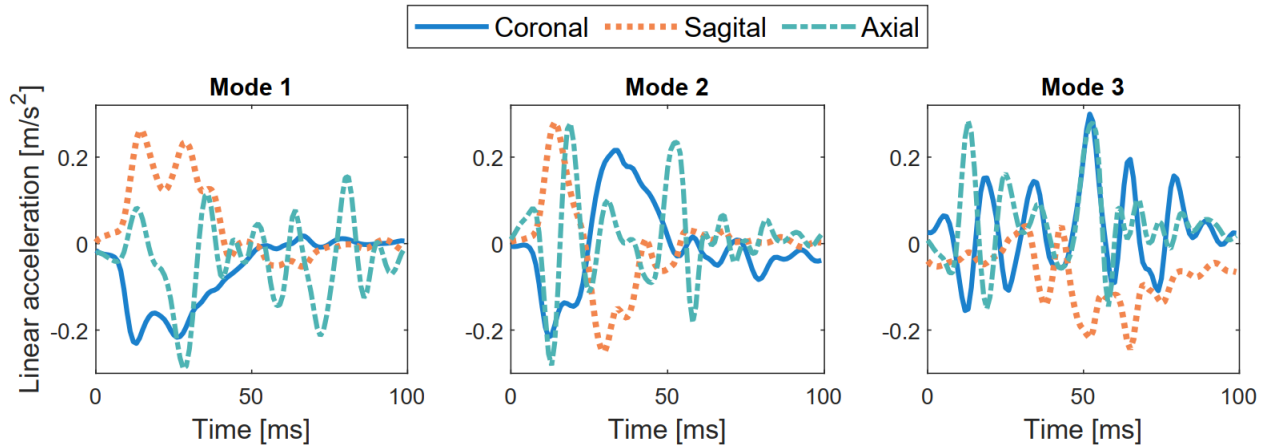

Figure SM.2: The three most relevant temporal modes for linear acceleration for the entire dataset.

Table SM.1:  $p$ -values for the different injury metrics obtained by Friedman test.

| Parameter    | PCA    | Tri.    | H.S     |
|--------------|--------|---------|---------|
| $HIC_{15}$   | 0.7919 | < 0.001 | < 0.001 |
| $RIC_{36}$   | 0.1478 | < 0.001 | < 0.001 |
| $BrIC$       | 0.636  | 0.380   | 0.311   |
| Coronal BAM  | 0.955  | < 0.001 | < 0.001 |
| Sagittal BAM | 0.917  | 0.007   | 0.001   |
| Axial BAM    | 0.846  | < 0.001 | < 0.001 |
| MPS WB       | 0.731  | 0.001   | < 0.001 |
| MPS CC       | 0.780  | < 0.001 | < 0.001 |
| FS CC        | 0.807  | < 0.001 | < 0.001 |

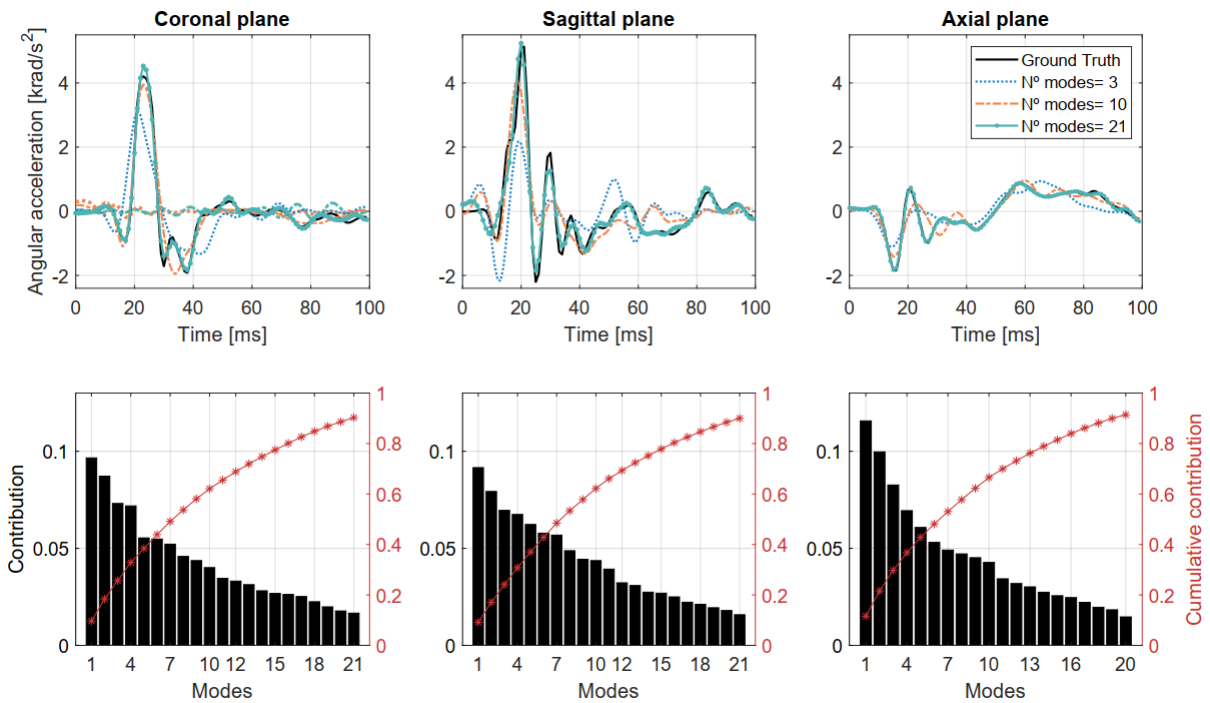

Figure SM.3: *Top*: Representative reconstruction of the angular acceleration data for a single head impact. *Bottom*: Individual and cumulative contribution of the temporal modes derived through PCA for angular velocity in each anatomical direction, constituting over 90% of the ground truth measurements.

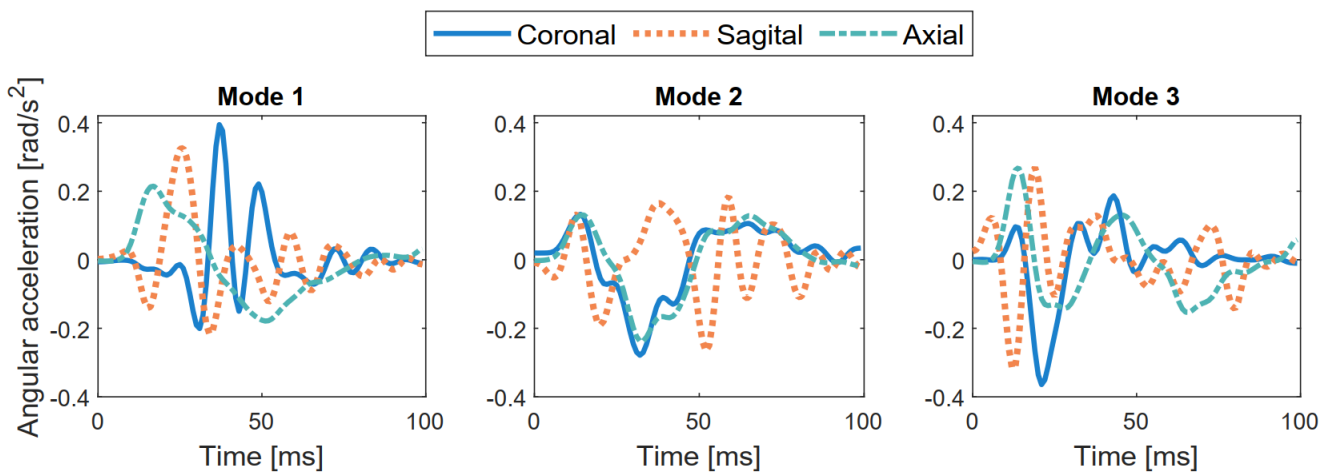

Figure SM.4: The three most relevant temporal modes for angular acceleration for the entire dataset.

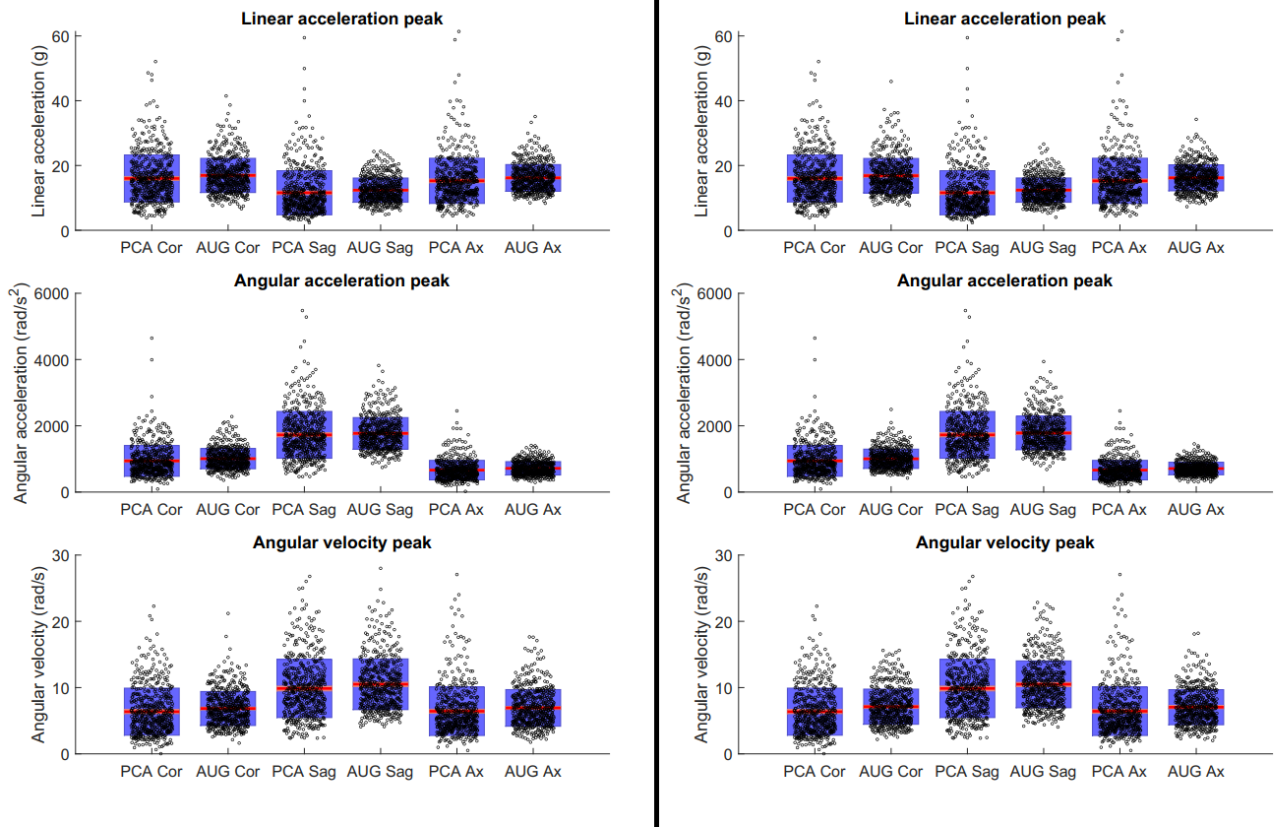

Figure SM.5: Peak distribution comparison between augmented data (two tests) and PCA original data.

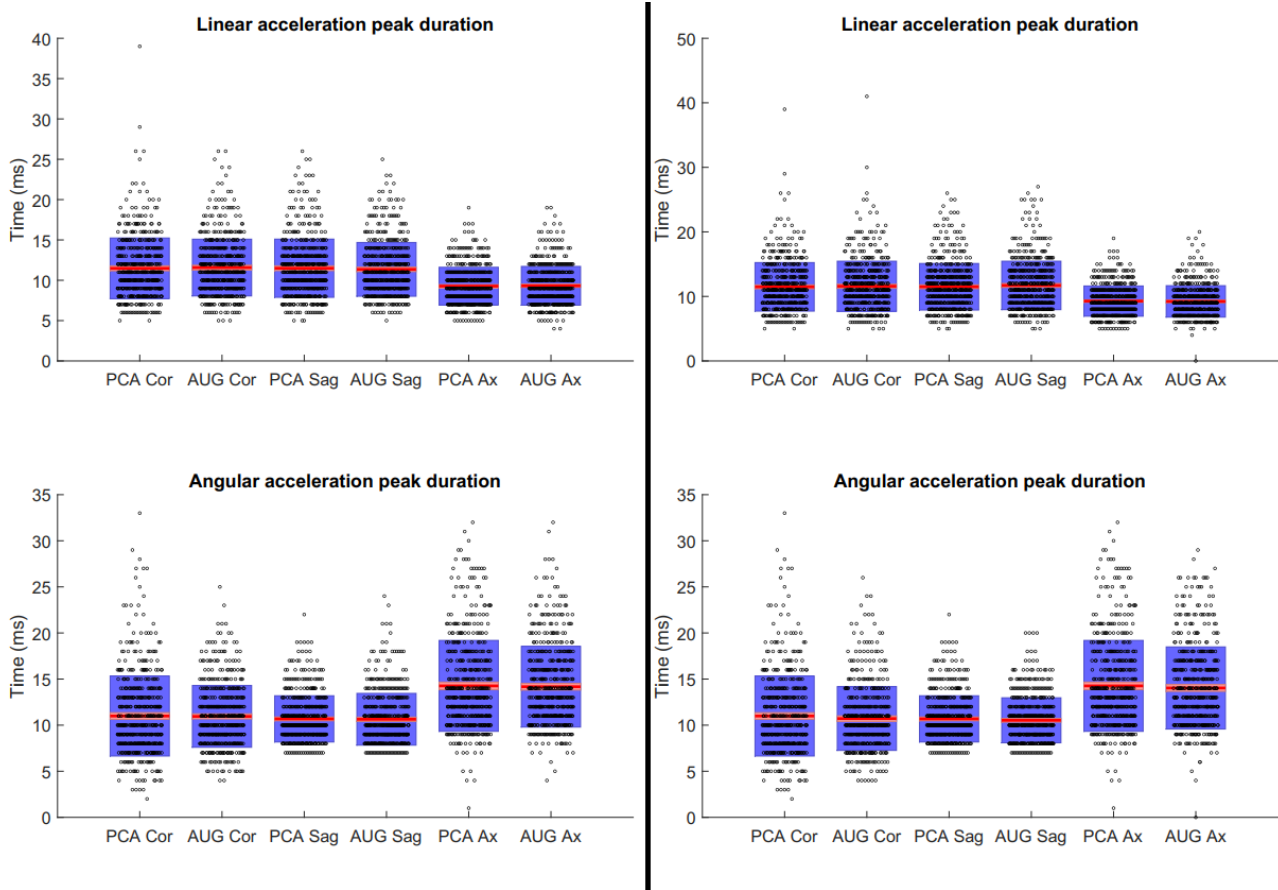

Figure SM.6: Peak duration distribution comparison between augmented data (two tests) and PCA original data.

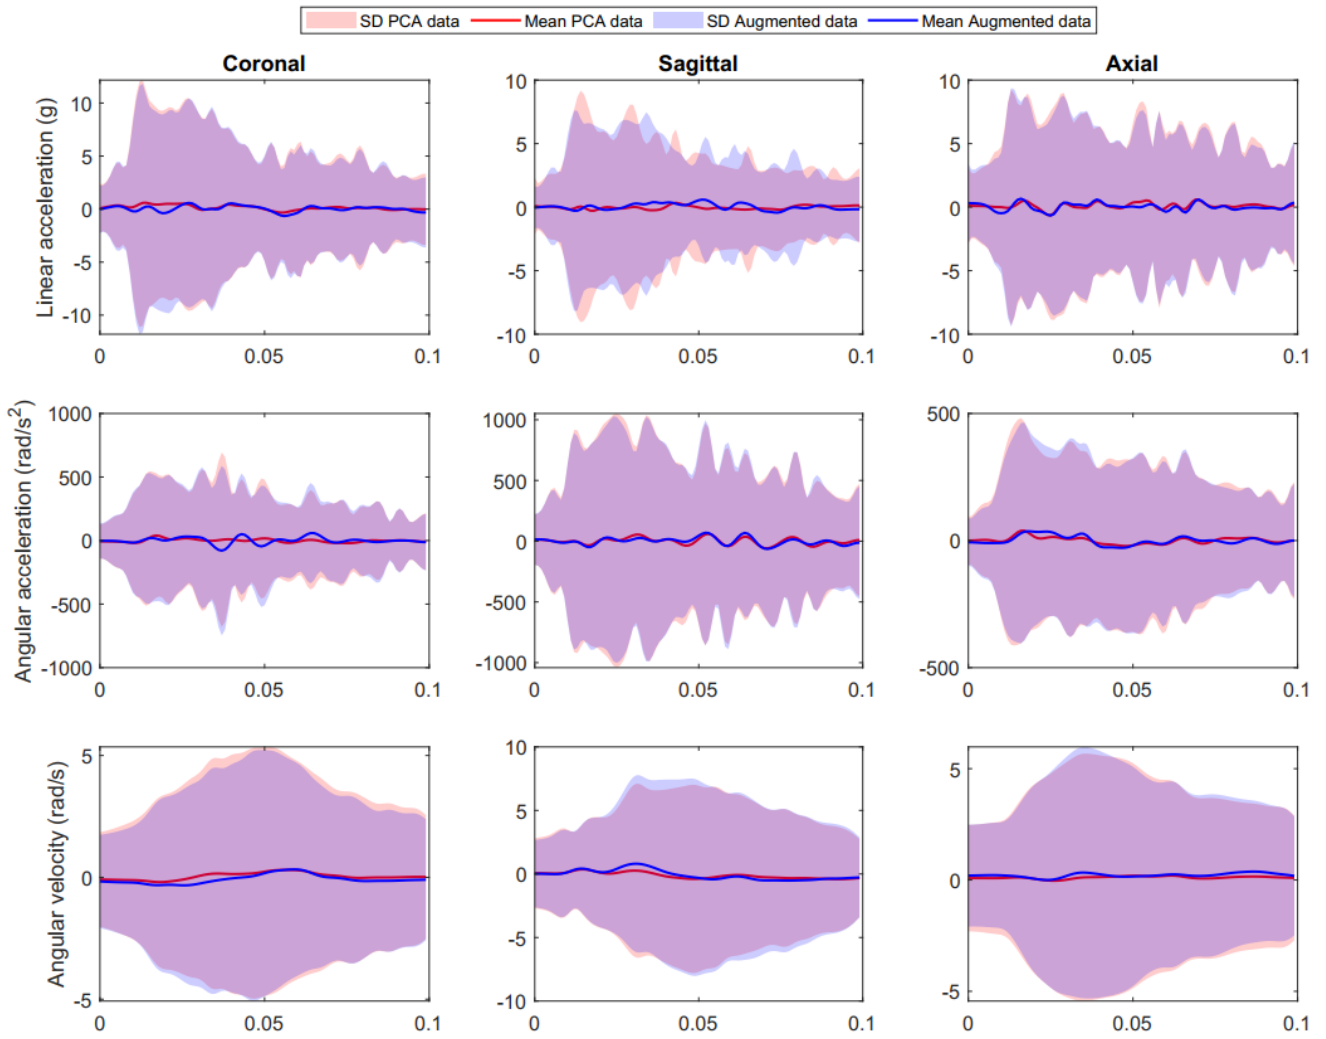

Figure SM.7: Statistical parameters per time point for PCA and an augmented dataset.

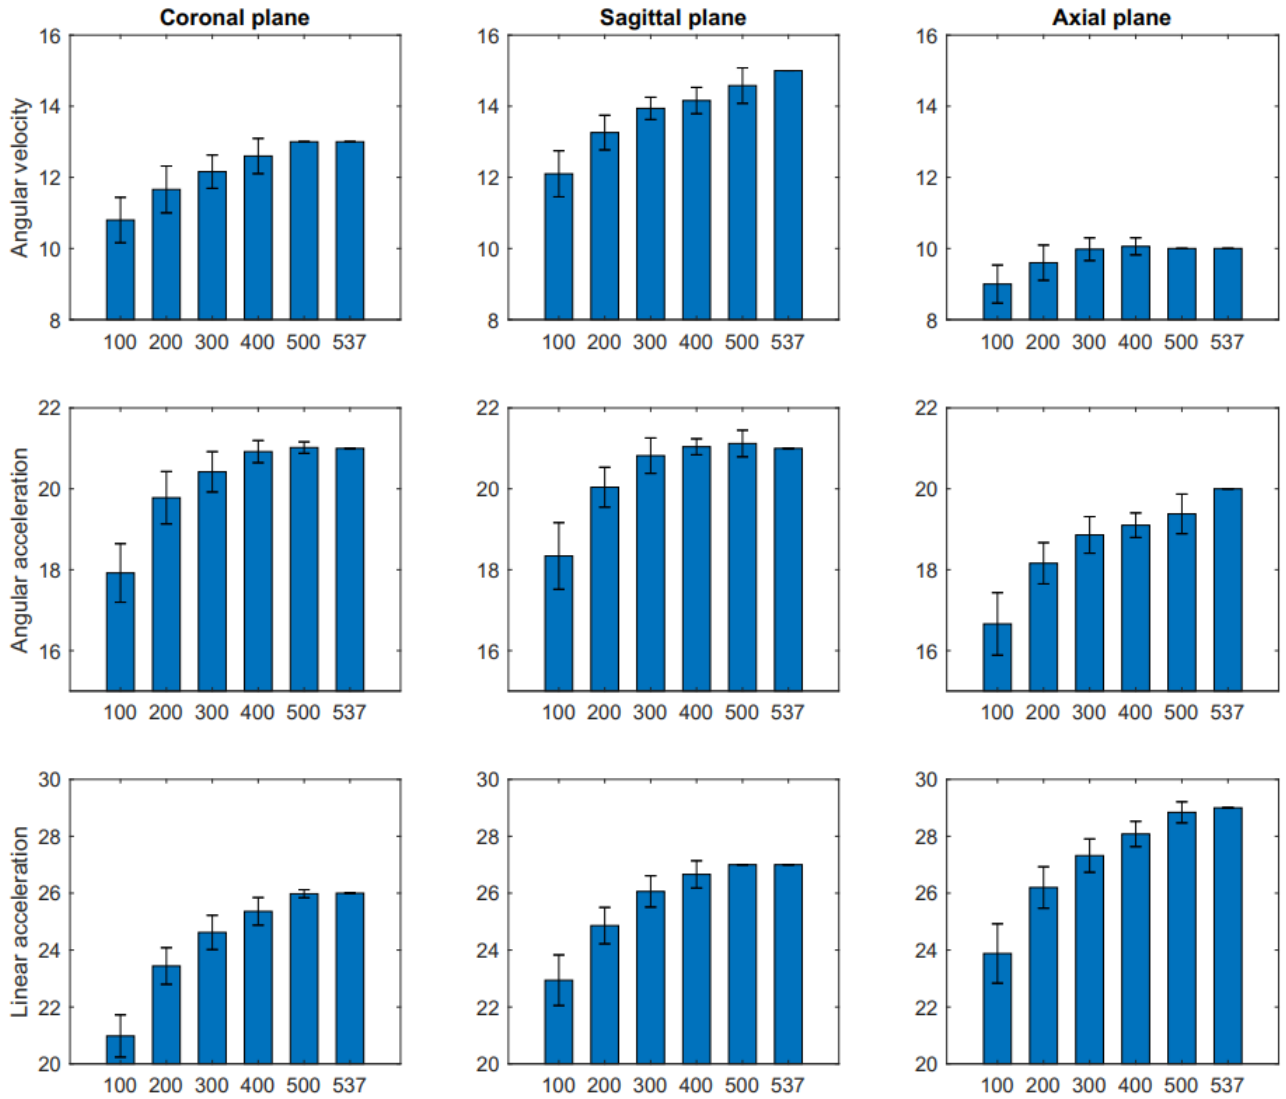

Figure SM.8: Required number of modes to satisfy Equation 1 for random subsets of different size, showing convergence to the values obtained with the entire dataset (537).
